# Supplementary material for: Molecular and Metagenomic Analyses Reveal High Prevalence and Complexity of Viral Infections in French-American Hybrids and North American Grapes
Source: MDPI journal article supplement (doi:10.3390/v15091949), 2023-09-19
Supplement: s1 [file s1]

## Supplemental materials

**Table S1.** Primers used in RT-PCR (or PCR) detection of target viruses. For the full names of viruses, refer to the list of abbreviations.

| Viruses | Primers    | Sequences                  | Amplicon<br>(bp) | Target<br>gene |
|---------|------------|----------------------------|------------------|----------------|
| GRBV    | GRBV685F   | GAGGGTTGTTTGAAGATAAAG      | 719              | CP             |
|         | GRBV1403R  | CCATAATAAACAGCGTGGTC       |                  |                |
| GLRaV-1 | LR1-502F   | TTGAGRGCTCTBATAAAYGAAC     | 379              | HSP70h         |
|         | LR1-880R   | CGTTMARTTCGYCKACSGACA      |                  |                |
| GLRaV-2 | LR2-14568F | RCDATGGAGYTRATGTCYGA       | 525              | CP             |
|         | LR2-15092R | AGCGTACATRCTYGCRAACA       |                  |                |
| GLRaV-3 | LR3-CP107F | TCTTAAARTAYGTAAAGGACGG     | 301              | CP             |
|         | LR3-CP407R | GGCTCGTTAATAACTTTTCGG      |                  |                |
| GLRaV-4 | LR4-13269F | GGACAATTTAGGTAATGTWGTGCTAC | 490              | P23<br>(ORF6)  |
|         | LR4-13758R | TATCCTCAGWGAGGAARCGG       |                  |                |
| GLRaV-7 | LR7-12163F | CTAGTGAATTACACCGAGAAGTC    | 550              | CP             |
|         | LR7-12712R | GTGACTTGGCACGCATGTATC      |                  |                |
| GRSPaV  | RSP35      | AGRYTTAGRGTRGCTAARGC       | 476              | Rep            |
|         | RSP36      | CACATRTCATCVCCYGCAA        |                  |                |
| GPGV    | GPGV6586F  | GAYATGTCGATTTCGTCAGGAG     | 436              | CP             |
|         | GPGV7021R  | CGACTTCTGGTGCCTTATCAC      |                  |                |
| GVA     | GVA6538F   | TCTTCGGGTACATCGCCTTG       | 325              | CP             |
|         | GVA6862R   | TCRAACATAACCTGTGGYTC       |                  |                |
| GVB     | GVB6448F   | ATGGAAAATATATCCCKGATGG     | 603              | CP             |
|         | GVB7050R   | GTAAACCACCTATATYTCRACAG    |                  |                |
| GFkV    | GFkV5161F  | TGGAAAGCYTGCCAGACCCT       | 377              | Rep            |
|         | GFkV5537R  | TCGTCRTABGTDCTGGTTC        |                  |                |
| ToRSV   | ToRSV7330F | TTCTGGGATTCTAATCGTACG      | 302              | 3'UTR          |
|         | ToRSV7613R | TGCAACTGCACGAGTATTATC      |                  |                |
| GFLV    | GFLV3135F  | TTGAGATTGGWTCYCGTTTC       | 558              | CP             |
|         | GFLV3692R  | CTGTCGCCACTAAAAGCATG       |                  |                |
| ArMV    | ArMV2291F  | CRGGTATTACGTGGGTTATGAG     | 292              | CP             |
|         | ArMV2582R  | GCTGCCTCAAACCTCAGCATA      |                  |                |

CP: capsid protein; HSP70h: heat shock protein 70 homologue; Rep: replicase protein; UTR: untranslated region.

**Table S2.** Summary of sequence contigs from Baco samples and their mapping to viruses and viroids. For the full names of viruses, refer to the list of abbreviations.

| Viruses | GenBank<br>accession<br>no. | Reference<br>isolates | Sequence<br>identity (%) | No. of<br>contigs | Genome<br>coverage (%) |
|---------|-----------------------------|-----------------------|--------------------------|-------------------|------------------------|
| GRSPaV  | KX274274.1                  | SK704-A               | 98                       | 1                 | 99.8                   |
| GPGV    | KR528587.1                  | Tannat-GvPGV          | 99                       | 1                 | 100                    |
| GRBV    | KY316023.1                  | ONRB5                 | 99                       | 1                 | 100                    |
| GVB     | GU733707.1                  | H1                    | 96-97                    | 3                 | 45.5                   |

**Table S3.** Summary of sequence contigs from Concord samples and their mapping to viruses and viroids. For the full names of viruses, refer to the list of abbreviations.

| Viruses | GenBank<br>accession<br>numbers | Reference<br>isolates | Sequence<br>identity (%) | No. of<br>contigs | Genome<br>coverage (%) |
|---------|---------------------------------|-----------------------|--------------------------|-------------------|------------------------|
| GLRaV-3 | GU983863.1                      | WA-MR                 | 98-100                   | 8                 | 94.4                   |
| GRBV    | KY426922                        | 93-26                 | 100                      | 1                 | 100                    |
|         | AY368590.1                      | Syrah                 | 96                       | 1                 | 52.6                   |
|         | AY368590.1                      | Syrah                 | 93-94                    | 3                 | 70.6                   |
| GRSPaV  | KR054734.1                      | JF                    | 98                       | 6                 | 99.2                   |
|         | FR691076.1                      | MG                    | 98                       | 1                 | 96.9                   |
|         | KX274275.1                      | SK704-B               | 95                       | 1                 | 33.8                   |
|         | HE591388                        | PG                    | 89                       | 1                 | 65.7                   |
|         | KX035000.1                      | SWTi clone 2          | 97                       | 3                 | 37.0                   |
|         | JX559646.1                      | 3138-07               | 86                       | 1                 | 31.1                   |
|         | KY426923                        | 8415                  | 84-88                    | 4                 | 30.1                   |

**Table S4.** Summary of sequence contigs from Coronation and their mapping to viruses and viroids. For the full names of viruses, refer to the list of abbreviations.

| Viruses | GenBank<br>accession<br>numbers | Reference<br>isolates | Sequence<br>identity (%) | No. of<br>contigs | Genome<br>coverage (%) |
|---------|---------------------------------|-----------------------|--------------------------|-------------------|------------------------|
| GRSPaV  | KX035002.1                      | SGM4 Clone 1          | 92-97                    | 6                 | 60.2                   |
| GPGV    | KU194413.1                      | BC-1                  | 98-99                    | 8                 | 98                     |
|         | FJ403375.1                      | Illinois RNA1         | 99                       | 2                 | 73.1                   |
| TSV     | FJ403376.1                      | Illinois RNA2         | 99-100                   | 2                 | 69.6                   |
|         | FJ403377.1                      | Illinois RNA3         | 91                       | 1                 | 91.7                   |

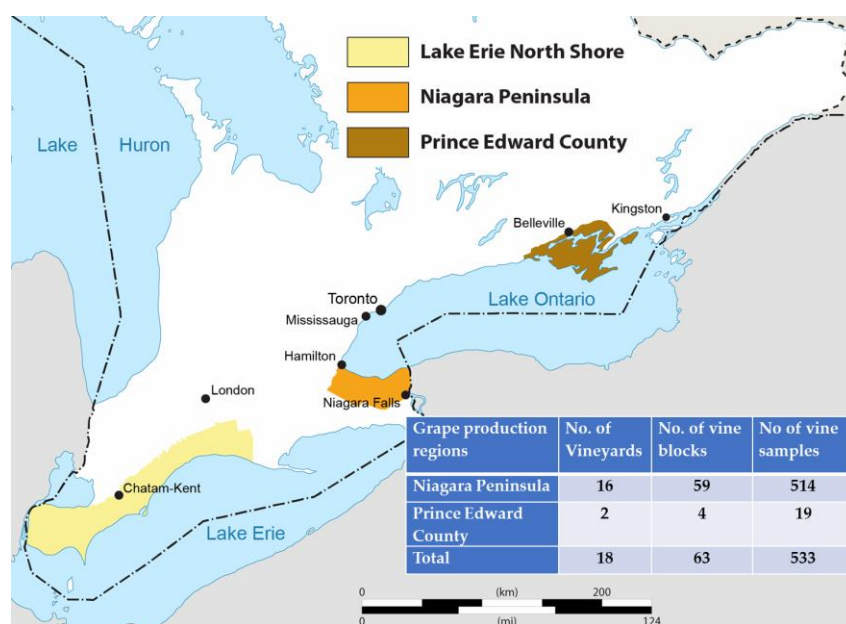

Figure S1. Sampling of grapevines across two primary appellations in Ontario for use in virus survey. The map is from <https://vineyards.com/wine-map/canada/ontario>. The insert table shows the numbers of samples, numbers of vine blocks and vineyards that were sampled from the two appellations in the province.
